# Supplementary material for: Structural and Functional Modulation of Gut Microbiota by Jiangzhi Granules during the Amelioration of Nonalcoholic Fatty Liver Disease
Source: Hindawi journal article supplement (doi:10.1155/2021/2234695), 2021-01-01
Supplement: f1 [file 2234695.f1.pdf]

Supplementary materials

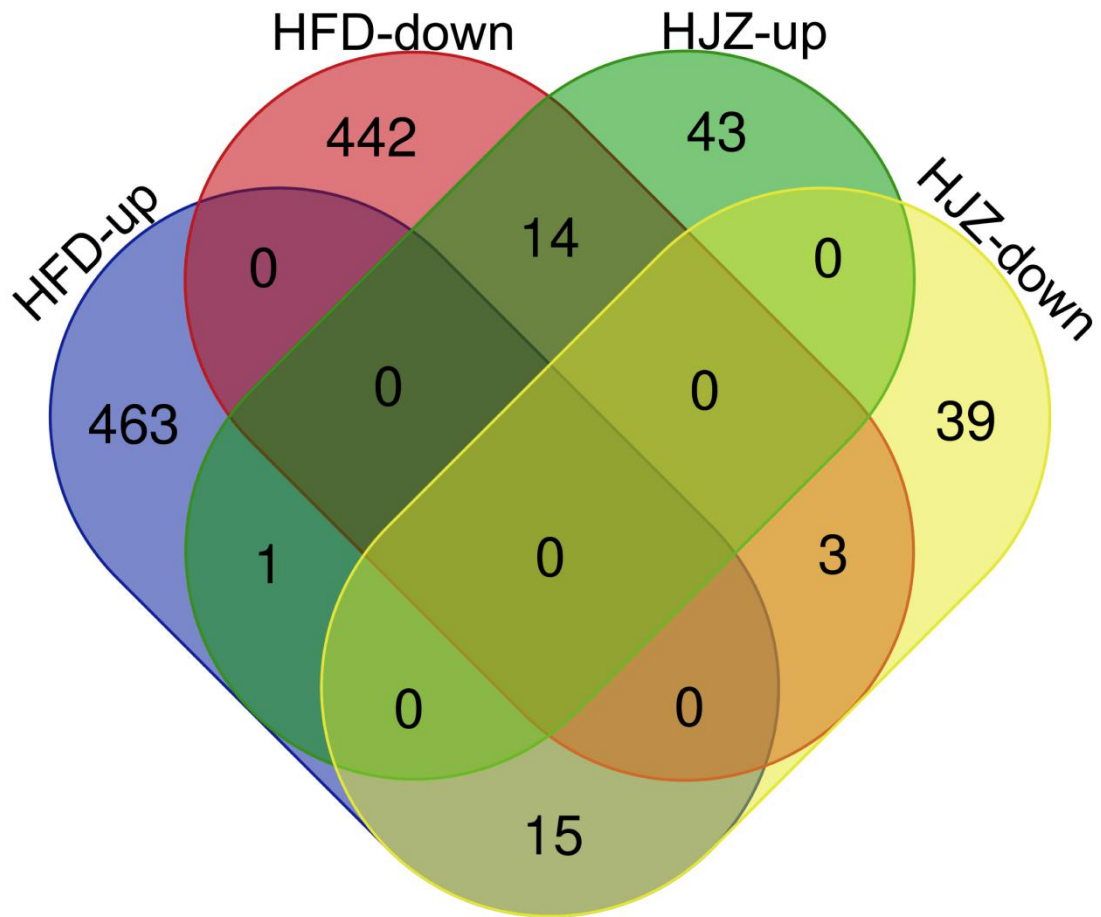

Supplementary figure 1. Venn diagrams showing the number of up- and down-regulated genes among NCD, HFD and HJZ group.

Supplementary Table 1 The primer sequences for RT-PCR

| <b>Gene Symbol</b> | <b>Forward Primer</b>    | <b>Reverse Primer</b>     |
|--------------------|--------------------------|---------------------------|
| GAPDH              | GTGTTCTACCCCAATGTGT      | ATTGTCATACCAGGAAATGAGCTT  |
| Scd1               | TCCTCCTTGGATTGTGTAGAACTT | AATGTCAGAAGAAATCAGGTGGGTA |
| PPAR $\gamma$      | GAAAGACAACGGACAAATCACCAT | CGGCTTCTACGGATCGAAACTG    |
| Adrb3              | CCTTGGGCGAAACTGGTTG      | GTTGGTGACAGCTAGGTAGCG     |
| Lipe               | TGGCACACCATTTTGACCTG     | TTGCGGTTAGAAGCCACATAG     |
| Pnpla2             | GGATGGCGGCATTTTCAGACA    | CAAAGGGTTGGGTTGGTTCAG     |
| Cpt2               | CAAAGACTCATCCGCTTTGTTC   | CATCACGACTGGGTTTGGGTA     |
| Acox1              | TAACTTCCTCACTCGAAGCCA    | AGTTCCATGACCCATCTCTGTC    |
| Ppargc1 $\alpha$   | TATGGAGTGACATAGAGTGTGCT  | CCACTTCAATCCACCCAGAAAG    |
| PPAR $\alpha$      | TACTGCCGTTTTCAAGTGC      | AGGTCGTGTTACAGGTAAGA      |
| Fabp5              | GGAAGGAGAGCACGATAACAAGA  | GGTGGCATTGTTTCATGACACA    |
| Occludin           | GTGGTTTGACACTGACTTCCC    | CTCCTCTCGGTGACAGAGTCT     |
| ZO-1               | TTTTTGACAGGGGGAGTGG      | TGCTGCAGAGGTCAAAGTTCAAG   |
| Muc5               | GTGGTTTGACACTGACTTCCC    | CTCCTCTCGGTGACAGAGTCT     |
| CD14               | GAGTTGTGACTGGCCCAGTCAGC  | GCAAAGCCAGAGTTCCTGAC      |
| TLR2               | AAGATGCGCTTCTGAATTTG     | TCCAGCGTCTGAGGAATGC       |
| TLR4               | TGTTCTTCTCCTGCCTGACA     | CATCAGGGACTTTGCTGAGTT     |
| NLRC4              | CGGCCTGCAACCTCTTTCTT     | TGGGCCAAAACATTCAGGTCT     |
| MCP-1              | ATCCCAATGAGTAGGCTGGAGAGC | CAGAAGTGCTTGAGGTGGTTGTG   |
